# Supplementary material for: A distinct D1-MSN subpopulation down-regulates dopamine to promote negative emotional state
Source: PubMed Central journal article supplement (PMC8807621; doi:10.1038/s41422-021-00588-5), 2021-11-30
Supplement: 41422_2021_588_MOESM2_ESM.pdf [file 41422_2021_588_MOESM2_ESM.pdf]

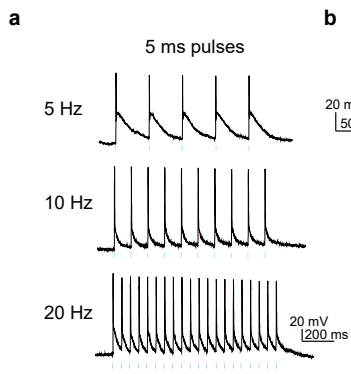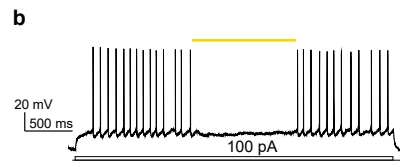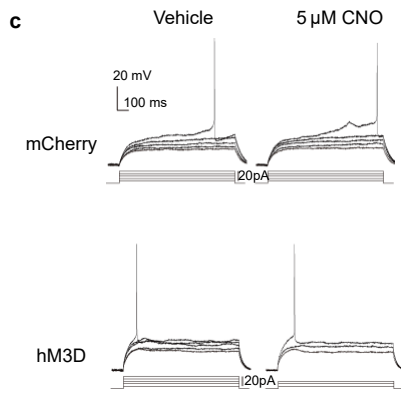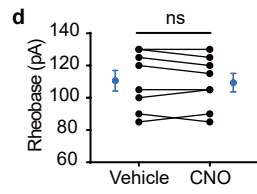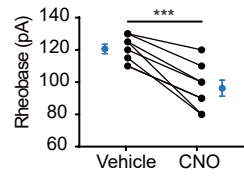

**Supplementary information, Fig. 2 *Ex vivo* Electrophysiological verification of optogenetic and chemogenetic stimulation.**

**a**, Action potentials generated by optical stimulation in accumbal D1-MSNs (5 Hz (top), 10 Hz (middle), 20 Hz (bottom), 473 nm, 2 mW, 5 ms pulse width, 1s duration). **b**, Representative voltage response evoked by 100-pA current injection showed that eNpHR3.0-expressing D1-MSNs were responsive to light inhibition (594 nm, 2 mW, 1s). **c**, Action potentials recorded from hM3D-expressing D1-MSN (n = 8) in response to progressively higher depolarizing currents before (baseline) and 15 min after CNO application. **d**, Rheobase decreased 15 min after CNO application. [mCherry: Paired *t*-test  $t(7) = 0.798$ ,  $p = 0.451$ ; hM3D: Paired *t*-test  $t(7) = 6.363$ ,  $p = 0.0004$ ] \*\*\* $p < 0.001$ . Related to Figure 2 and Extended Data Figure 6.
