# Supplementary material for: A distinct D1-MSN subpopulation down-regulates dopamine to promote negative emotional state
Source: PubMed Central journal article supplement (PMC8807621; doi:10.1038/s41422-021-00588-5), 2021-11-30
Supplement: 41422_2021_588_MOESM3_ESM.pdf [file 41422_2021_588_MOESM3_ESM.pdf]

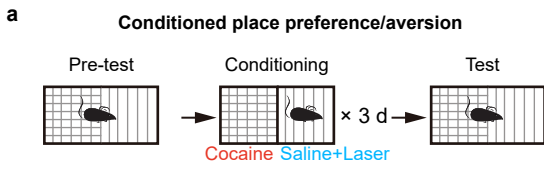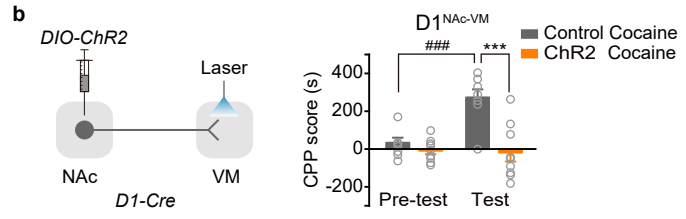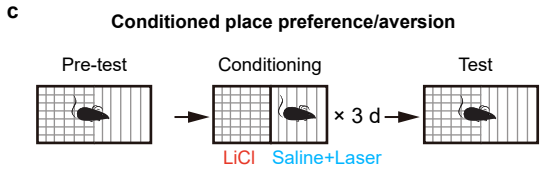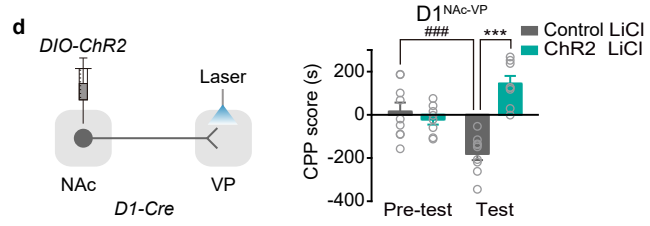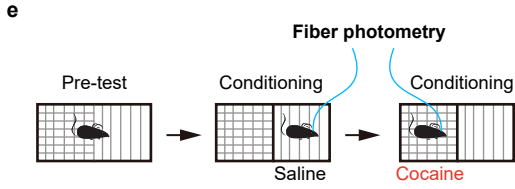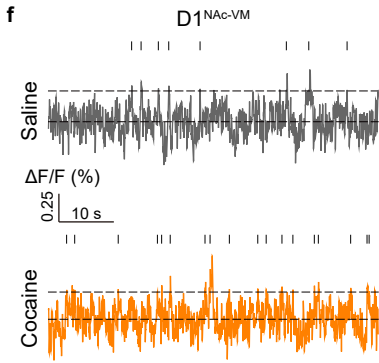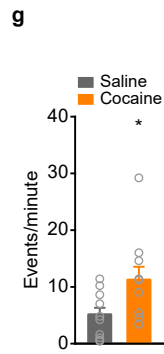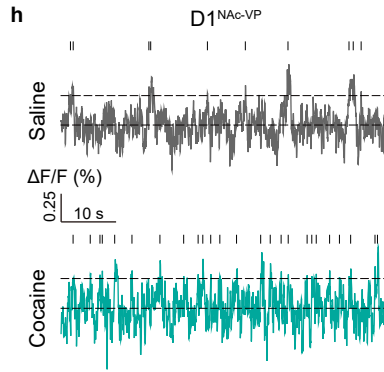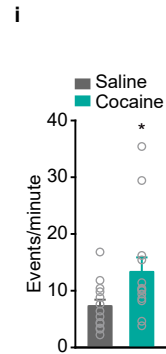

**Supplementary information, Fig. 3 Cocaine conditioning increases frequency of Ca<sup>2+</sup> transient events in both D1<sup>NAc-VM</sup> and D1<sup>NAc-VP</sup> projections.**

**a,c**, Schematic of experimental design. *AAV<sub>9</sub>-EF1 $\alpha$ -DIO-hChR2-mCherry* or *AAV<sub>9</sub>-EF1 $\alpha$ -DIO-mCherry* was injected into the NAc of *D1-Cre* mice, and optical fibers were bilaterally implanted over the VM or VP. Laser stimulation was presented during saline conditioning. Cocaine and LiCl was conditioned in the other side. After three-day conditioning, the CPP/A test was performed. **b,d**, Bar graphs of CPP score. [Two-way RM ANOVA, VM: Control n = 8, ChR2 n = 9,  $F_{\text{treatment} \times \text{session}}(1, 33) = 11.258, p = 0.004$ ; VP: Control n = 8, ChR2 n = 9,  $F_{\text{treatment} \times \text{session}}(1, 33) = 31.94, p < 0.001$ .] \*\*\* $p < 0.001$ . **e**, Schematic of experimental design. *AAV<sub>9</sub>-EF1 $\alpha$ -DIO-GCaMP6m* was injected into the NAc of *D1-Cre* mice, with optical fiber implanted over the VM or VP. **f,h**, Representative photometry signal traces of D1-MSN axonal terminals in the VM (**f**) and VP (**h**) during saline and cocaine conditioning. Tick marks indicate events above threshold. **g,i**, Frequency of Ca<sup>2+</sup> transient events in D1<sup>NAc-VM</sup> (**g**) and D1<sup>NAc-VP</sup> (**i**) terminals was calculated during 5-10 min after saline or cocaine treatment [Two-tailed *Student's t*-test, n = 11,  $t(20) = -2.336, p = 0.0282$ ; Mann-Whitney U test, n = 13,  $Z = 2.052, p = 0.0387$ .] \* $p < 0.05$ . Related to Figure 3.
