# Supplementary material for: A distinct D1-MSN subpopulation down-regulates dopamine to promote negative emotional state
Source: PubMed Central journal article supplement (PMC8807621; doi:10.1038/s41422-021-00588-5), 2021-11-30
Supplement: 41422_2021_588_MOESM6_ESM.pdf [file 41422_2021_588_MOESM6_ESM.pdf]

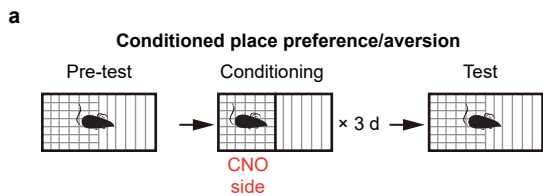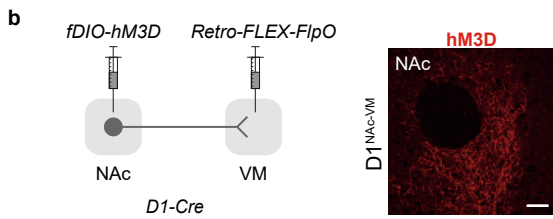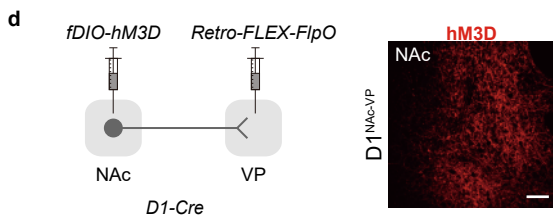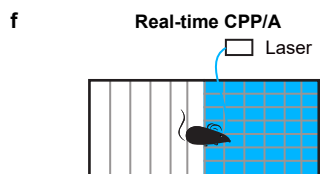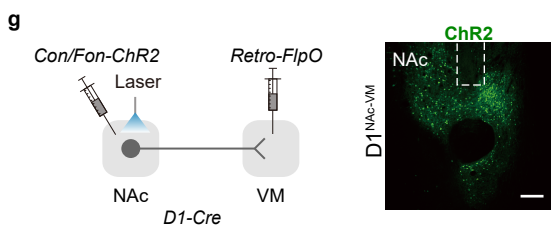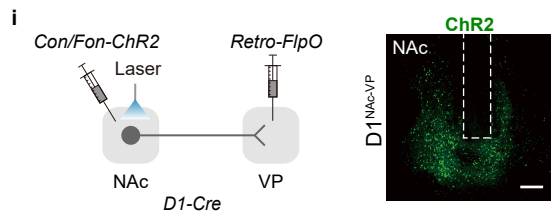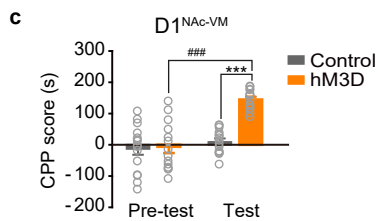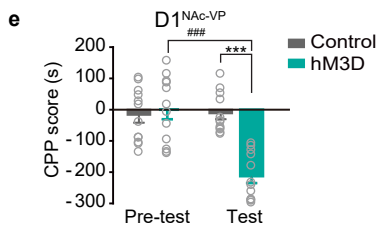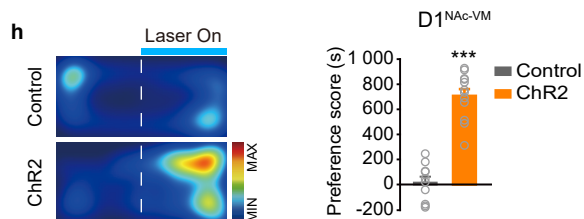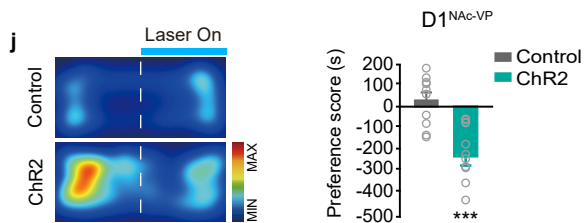

**Supplementary information, Fig. 6 Activation of D1<sup>NAc-VM</sup> neurons produce CPP and activation of D1<sup>NAc-VP</sup> neurons produce CPA.**

**a**, Schematic of CPP/A task. After three-day CNO paired conditioning, the CPP/A test was performed. **b,d**, Viral infection and representative images of hM3D-mCherry<sup>+</sup> D1<sup>NAc-VM</sup> (**b**) or D1<sup>NAc-VP</sup> (**d**) neurons in the NAc. *AAV9-hEF1a-fDIO-hM3D-mCherry* was injected into the NAc and *AAV2/retro-CAG-FLEX-FlpO* was injected into the VM or VP of *DI-Cre* mice. Scale bar: 100  $\mu$ m. **c,e**, Bar graphs of CPP score. [Two-way RM ANOVA. VM: Saline n = 15, CNO n = 14,  $F_{\text{treatment} \times \text{session}}(1,57) = 21.326, p < 0.001$ ; VP: Saline n = 12, CNO n = 12,  $F_{\text{treatment} \times \text{session}}(1,47) = 67.686, p < 0.001$ ]. \*\*\* $p < 0.001$  vs Control, ### $p < 0.001$  vs Pre-test. **f**, Schematic of RTPP/A task. **g,i**, Viral infection and representative images of the optical fiber tip and ChR2-EYFP expression in the NAc. *AAV9-hSyn-Con/Fon-ChR2-EYFP* or *AAV9-hSyn-Con/Fon-EYFP* was injected into the NAc and *AAV2/retro-hSyn-FlpO* was injected into the VM or VP of *DI-Cre* mice. An optical fiber was implanted over the NAc and the RTPP/A test was performed. **h,j**, Representative locomotor heat maps of Test and bar graph of Preference score. [VM: Control n = 10, ChR2 n = 12, Two-tail *Student's t*-test,  $t(20) = -9.406, p < 0.001$ ; VP: Control n = 10, ChR2 n = 12,  $t(20) = 4.436, p = 0.0002$ ] \*\*\* $p < 0.001$ . Related to Figure 4.
