# Supplementary material for: A distinct D1-MSN subpopulation down-regulates dopamine to promote negative emotional state
Source: PubMed Central journal article supplement (PMC8807621; doi:10.1038/s41422-021-00588-5), 2021-11-30
Supplement: 41422_2021_588_MOESM7_ESM.pdf [file 41422_2021_588_MOESM7_ESM.pdf]

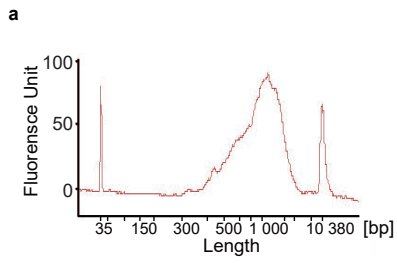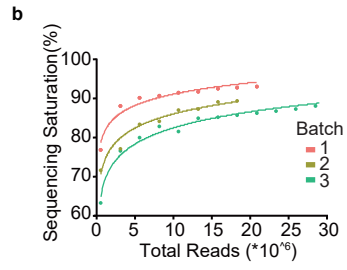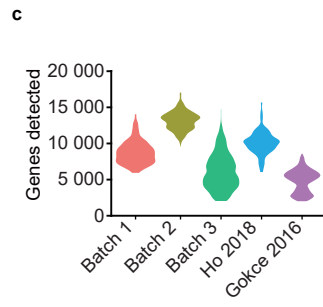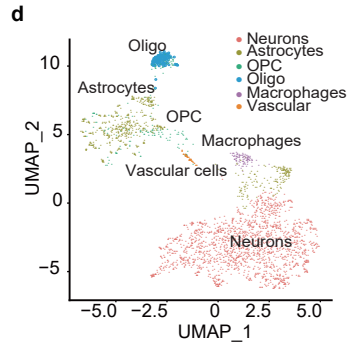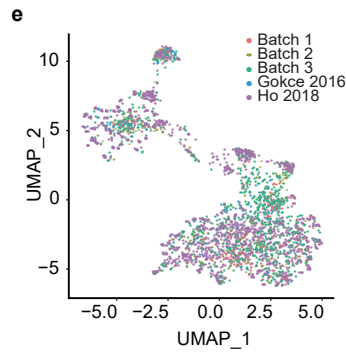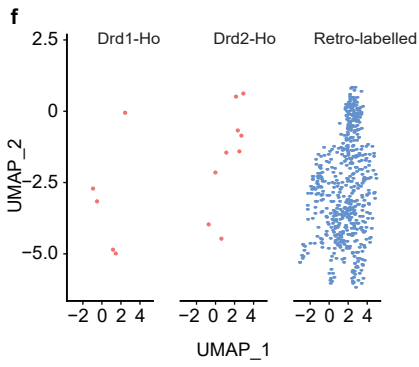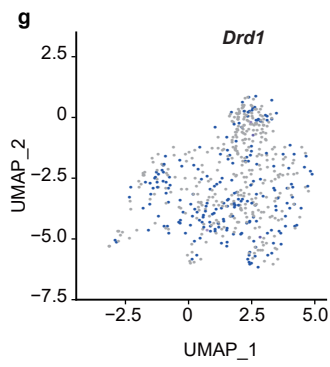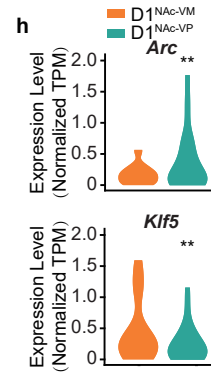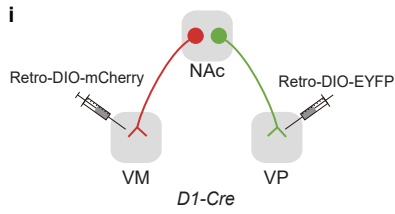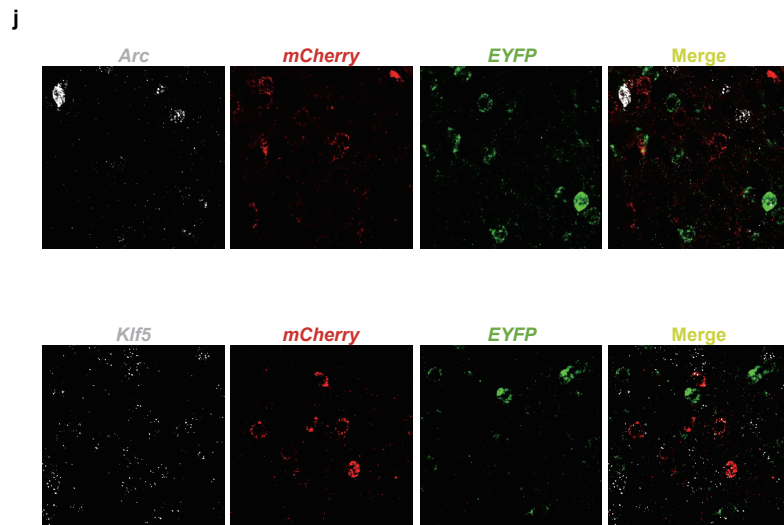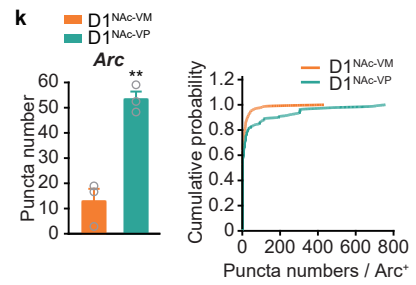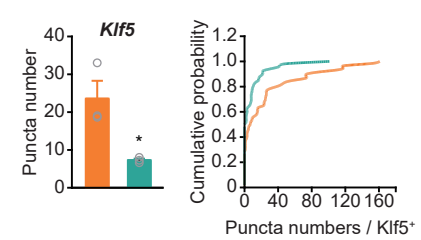

**Supplementary information, Fig. 7 Quality control of scRNA-Seq and correlation with previous RNA-Seq datasets of mouse striatum.**

**a**, Representative example of PCR-amplified cDNA from one cell. **b**, Sequencing saturation plot from three batches of libraries prepared. The percentage of cumulative detected kmers from every 10k reads were plotted. **c**, Number of gene count distribution from each batch of samples, as well as striatal single cell data from Ho et al. (Ho 2018) and Gokce et al. (Gokce 2016). **d**, Distribution of data as colored by batch and origin. **e**, UMAP plot of combined single cell data from Ho *et al.* (Ho 2018) and Gokce *et al.* (Gokce 2016) and data we collected. **f**, Comparison of distribution of D1 and D2 cells from Ho *et al.* (Ho 2018) in neurons we collected. **g**, Distribution of D1-expressing cells in the neuronal population. **h**, Violin plot of *Arc* and *Klf5* expression in transcriptome analysis [Negative binomial generalized linear models, D1<sup>NAc-VM</sup> n = 120 cells, D1<sup>NAc-VP</sup> n = 182 cells, *Arc*: W = -2.743, p = 0.007; *Klf5*: W = 3.084, p = 0.002] **i,j**, Representative confocal images of smFISH of *EYFP* (D1<sup>NAc-VP</sup>), *mCherry* (D1<sup>NAc-VM</sup>) and *Arc* or *Klf5* (white) in the NAc of D1-Cre mice with the injection of *AAV<sub>2/retro</sub>-EF1 $\alpha$ -DIO-EYFP* into the VP and *AAV<sub>2/retro</sub>-EF1 $\alpha$ -DIO-mCherry* in the VM. Scale bar: 25  $\mu$ m. **k**, Quantification bar graph and cumulative frequency distribution of *Arc* and *Klf5* expression in D1<sup>NAc-VM</sup> (*EYFP*<sup>+</sup>) and D1<sup>NAc-VP</sup> (*mCherry*<sup>+</sup>) neurons. [VM: n = 3, VP: n = 3, Two-tail Student's *t*-test, *Arc* :*t*(4) = -6.831, p = 0.0024; *Klf5* :*t*(4) = 3.423, p = 0.0267] \*\*\* p < 0.001 \* p < 0.05, \*\* p < 0.01. Related to Figure 4.
