# Supplementary material for: A distinct D1-MSN subpopulation down-regulates dopamine to promote negative emotional state
Source: PubMed Central journal article supplement (PMC8807621; doi:10.1038/s41422-021-00588-5), 2021-11-30
Supplement: 41422_2021_588_MOESM10_ESM.pdf [file 41422_2021_588_MOESM10_ESM.pdf]

a

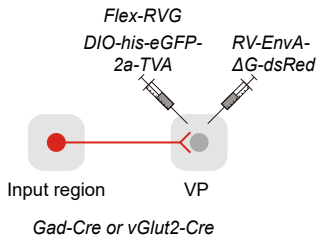

b

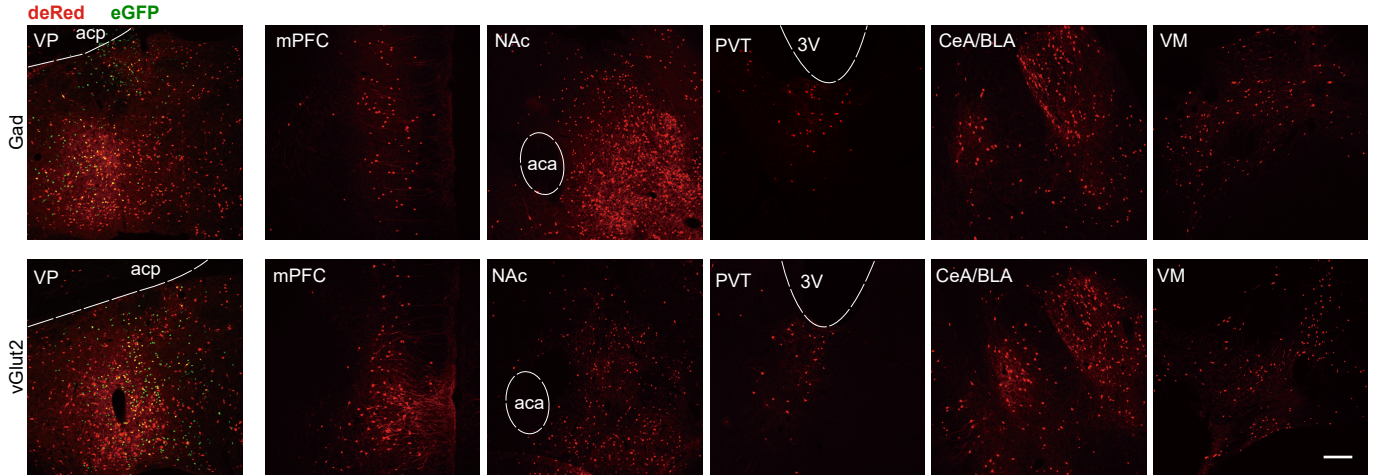

c

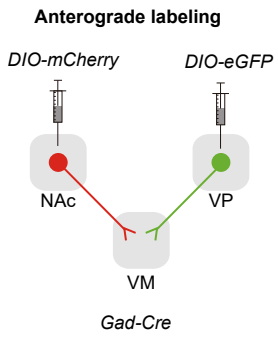

d

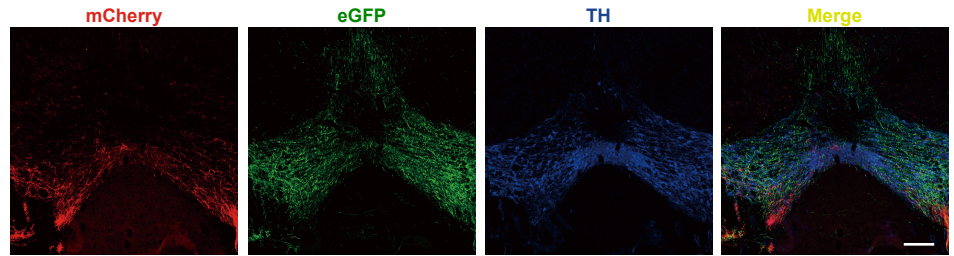

**Supplementary information, Fig. 10 Rabies virus-based retrograde labeling of GABAergic or glutamatergic neurons in the VP.**

**a**, Schematic of experimental design. *AAV9-EF1 $\alpha$ -DIO-his-eGFP-2a-TVA* and *AAV9-EF1 $\alpha$ -DIO-RVG* were unilaterally injected into the VP of *Gad-Cre* or *vGlut2-Cre* mice. Two weeks later, *RV-ENVA-deltaG-dsRed* (RVdG) was injected into the same VP site. Eight days were allowed for rabies to transduce and label synaptic connected input neurons. **b**, Representative confocal images of rabies labeling of given regions inputs to VP GABAergic or glutamatergic neurons from *Gad-Cre* or *vGlut2-Cre* mice, respectively. Scale bar: 100  $\mu$ m. **c**, Schematic of anterograde labeling of GABA<sup>NAc-VM</sup> and GABA<sup>VP-VM</sup> projections. *AAV9-EF1 $\alpha$ -DIO-mCherry* and *AAV9-EF1 $\alpha$ -DIO-eGFP* were bilaterally injected into the NAc and VP of *Gad-Cre* mice. **d**, Representative images of mCherry<sup>+</sup> and eGFP<sup>+</sup> projectors in the VM with immunostaining of TH<sup>+</sup> neurons. Scale bar: 100  $\mu$ m. Related to Figure 5.
